# Supplementary material for: A high-capacity hexaazatrinaphthylene anode for aqueous organic hybrid flow batteries
Source: Royal Society of Chemistry journal article supplement (doi:10.1039/d1ta06138k), 2021-01-01
Supplement: d1ta06138k1.pdf [file d1ta06138k1.pdf]

## Supporting Information

### High-capacity hexaazatrinaphthylene anode for aqueous organic hybrid flow battery

Zirui Liu <sup>a†</sup>, Zheng Wang <sup>a†</sup>, Yanjun Shi <sup>a</sup>, Yong-Miao Shen <sup>b</sup>, Wenchang Wang <sup>a</sup>, Zhidong Chen <sup>a</sup>, Juan Xu <sup>\*a</sup> and Jianyu Cao <sup>\*a</sup>

<sup>a</sup>*Jiangsu Key Laboratory of Advanced Catalytic Materials and Technology, Changzhou University, Changzhou 213164, China.*

<sup>b</sup>*Department of Chemistry, Zhejiang Sci-Tech University, Hangzhou 310018, China.*

<sup>†</sup>Z. L. and Z. W. contributed equally.

\*Corresponding author. E-mail: jycao@cczu.edu.cn (Jianyu Cao);  
cjytion@cczu.edu.cn (Juan Xu)

### Electron transfer coefficient ( $\alpha$ ) and charge transfer rate constant ( $k^0$ ) for ET1 and ET2

**Fig. S1** shows CVs of HATN electrode in 1 M KOH solution at different scan rates ( $\nu$ ). The scan rates increase from 0.2 to 4 V s<sup>-1</sup>. The  $\alpha$  and  $k^0$  were determined by Laviron's method <sup>[S1]</sup> from the following equation:

$$\Delta E_p = \frac{2.303RT}{\alpha(1-\alpha)nF} \left[ \alpha \log(1-\alpha) + (1-\alpha) \log \alpha - \log \left( \frac{RTk^0}{nF} \right) \right] + \frac{2.303RT}{\alpha(1-\alpha)nF} \log \nu \quad (\text{Eq. S1})$$

where  $\Delta E_p$  is the potential difference between the oxidation and reduction peak,  $\nu$  is the

scan rate,  $n$  is the transfer electron number ( $n=3$ ),  $k^0$  is charge transfer rate constant, and  $\alpha$  is electron transfer coefficient, respectively.

The plot of  $\Delta E_p$  versus  $\log(v)$  produces a straight line along with an intercept at high scan rates (**Fig. S2a and S2b**). The  $k^0$  is obtained from the intercept value. The  $\alpha$  value for both ET1 and ET2 of HATN can be calculated from the slope of the  $\Delta E_p$ - $\log(v)$  dependence ( $2.3RT/\alpha(1-\alpha)nF$ ), which is about 0.74 and 0.53, respectively. Then, the  $k^0$  value for ET1 and ET2 is calculated to be ca. 9.66 and 33.3  $s^{-1}$ , respectively.

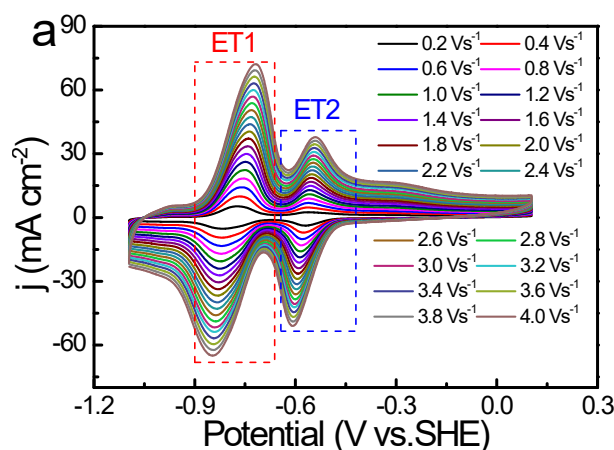

**Fig. S1** CVs of HATN electrode in 1 M KOH solution at different scan rates (the scan rates ( $v$ ) from 0.2 to 4  $V s^{-1}$ ).

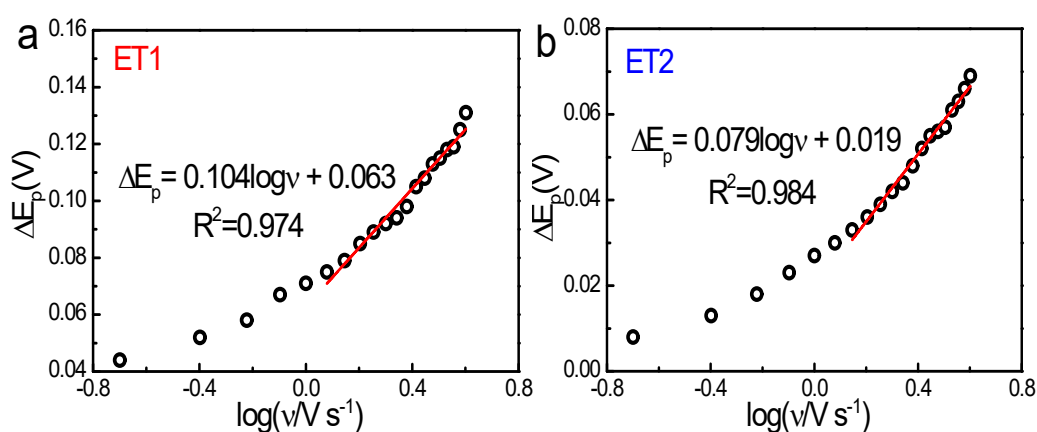

**Fig. S2** (a) Plot of  $\Delta E_p$  versus  $\log(v)$  for ET1 of HATN electrode. (b) Plot of  $\Delta E_p$  versus  $\log(v)$  for ET2 of HATN electrode.

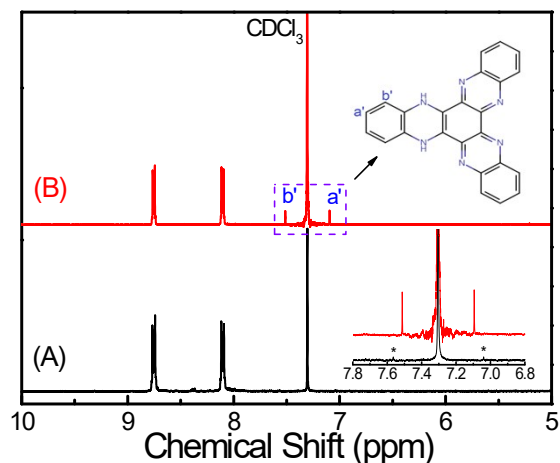

**Fig. S3**  $^1\text{H}$  NMR (500 MHz,  $\text{CDCl}_3$ ) spectra. (A) as-synthesized HATN. (B) HATN after 7 days treating in 1 M KOH at 25  $^\circ\text{C}$ .

The as-synthesized HATN (11.5 mg) was added to 20 mL of 1 M KOH solution with intense magnetic stirring at room temperature and kept for 7 days. Then, 20 mL of chloroform was added to dissolve HATN and extract possible decomposition products. After the chloroform was removed by rotary evaporation, about 0.5 mL deuterated chloroform was added to form a saturated solution of HATN that was used as the sample for the  $^1\text{H}$  NMR analysis. Two additional proton peaks located at 7.51 and 7.09 ppm were observed in the  $^1\text{H}$  NMR spectrum of the HATN sample after 7 days treating in 1 M KOH, which was assigned to hydrogenated hexaazatrinaphthylene (*e.g.* HATN-2H, a by-product of HATN) that was enriched during sample processing.

**Table S1.** Summary of various hybrid RFBs.  $j$ , current density; AC, areal capacity;  $\mu$ , mass loading of anode material;  $\eta$ , material utilization. NA, not applicable.

| Flow cell                                                   | $j$ (mA cm <sup>-2</sup> ) <sup>a</sup> | AC (mAh cm <sup>-2</sup> ) <sup>b</sup> | $\mu$ (mg cm <sup>-2</sup> ) <sup>c</sup> | $\eta$ <sup>d</sup>                 | Cycle number | Anolyte                                            |
|-------------------------------------------------------------|-----------------------------------------|-----------------------------------------|-------------------------------------------|-------------------------------------|--------------|----------------------------------------------------|
| Zn-polyiodide <sup>S2</sup>                                 | 10                                      | 234.3                                   | 429.2                                     | 66.6%                               | 38           | 3.5 M ZnI <sub>2</sub>                             |
| Zn-Br <sub>2</sub> &I <sub>2</sub> <sup>S3</sup>            | 10                                      | 34                                      | 122.6                                     | 33.8%                               | 20           | 5M ZnI <sub>2</sub> +<br>2.5 M ZnBr <sub>2</sub>   |
| Zn-Br <sub>2</sub> single <sup>S4</sup>                     | 80                                      | 23.2                                    | 58 <sup>e</sup>                           | 48.7% <sup>e</sup>                  | 500          | 3M ZnBr <sub>2</sub>                               |
| Zn-Br <sub>2</sub> <sup>S5</sup>                            | 40                                      | 40                                      | 726.7                                     | 6.7%                                | 140          | 2 M ZnBr <sub>2</sub>                              |
| Zn-Br <sub>2</sub> <sup>S6</sup>                            | 100                                     | 20                                      | 545                                       | 4.5%                                | 5000         | 2 M ZnBr <sub>2</sub> +<br>0.5 M ZnCl <sub>2</sub> |
| Zn-Fe <sup>S7</sup>                                         | 100                                     | 26.3                                    | 40.9                                      | 78.5%                               | 210          | 0.5 M<br>Zn(OH) <sub>4</sub> <sup>2-</sup>         |
| Zn-Mn <sup>S8</sup>                                         | 40                                      | 13.3                                    | 54.5                                      | 30.0%                               | 100          | 1.5 M ZnCl <sub>2</sub>                            |
| Zn-<br>poly(TEMPO)<br>static <sup>S9</sup>                  | 2                                       | 0.108                                   | 3.14                                      | 4.2%                                | 1000         | 0.08 M<br>ZnCl <sub>2</sub>                        |
| Zn-TEMPO-<br>SO <sub>3</sub> K <sup>S10</sup>               | 40                                      | ~20                                     | 261.6                                     | 9.3%                                | 50           | 2 M ZnCl <sub>2</sub>                              |
| PPyQX-<br>K <sub>4</sub> Fe(CN) <sub>6</sub> <sup>S11</sup> | ~1.5 (4<br>A g <sup>-1</sup> )          | 0.18                                    | 0.37                                      | 24.2% (at<br>1 Ag <sup>-1</sup> )   | 1000         | NA                                                 |
| TPPHZ-<br>K <sub>4</sub> Fe(CN) <sub>6</sub> <sup>S12</sup> | 10.2 (10<br>A g <sup>-1</sup> )         | 0.09                                    | 1.02                                      | 71.7% (at<br>1 Ag <sup>-1</sup> )   | 1200         | NA                                                 |
| HATN-<br>K <sub>4</sub> Fe(CN) <sub>6</sub> (this<br>work)  | 20 (8 A<br>g <sup>-1</sup> )            | 0.668                                   | 2.5                                       | 63.9% (at<br>0.5 Ag <sup>-1</sup> ) | 1500         | NA                                                 |

<sup>a</sup>The applied current density during the long-term charge-discharge cycling. <sup>b</sup>Areal capacity is obtained by dividing the achieved reversible capacity by the active electrode area. <sup>c</sup>The mass loading of anode material ( $\mu$ ) is calculated using the following formula:

$$\mu = \frac{nCVF}{3.6A} \quad (\text{Eq. S1})$$

where  $n$  is the number of electrons per mole,  $C$  is the concentration of zinc ion in the anolyte,  $V$  is volume of the anolyte,  $F$  is the Faraday constant and  $A$  is the electrode area. <sup>d</sup>The material utilization ( $\eta$ ) is obtained by dividing the achieved reversible capacity by the theoretical capacity of the anolyte or the solid anode material. <sup>e</sup>Based on the volume of anolyte of 14.2 mL.

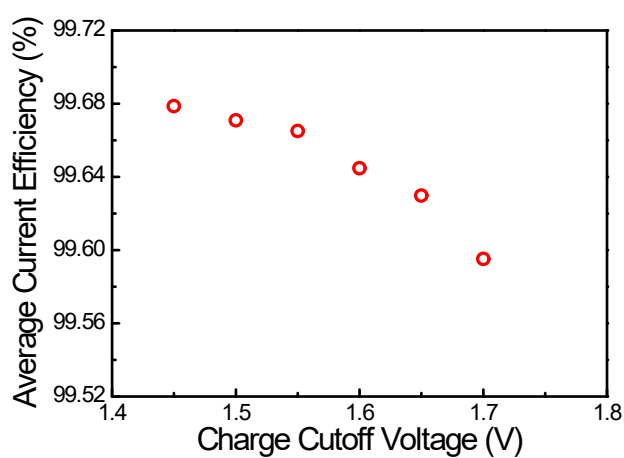

**Fig. S4** Average current efficiency of the HATN//K<sub>4</sub>[Fe(CN)<sub>6</sub>] cell versus charge cut-off voltage at a constant current density of 8 A g<sup>-1</sup>.

**Table S2** Performance comparisons of the HATN//K<sub>4</sub>[Fe(CN)<sub>6</sub>] AHFB with other previously-reported organic AHFBs. OCV, open circuit voltage (in V); SDC, specific discharge capacity; CE, Coulomb efficiency; EE, energy efficiency; CRPC, capacity retention per cycle. NA, not applicable. All performances data are obtained at room temperature.

| AHFB                                                           | OCV     | SDC                                                             | CE                                                           | EE                                                           | CRPC                    |
|----------------------------------------------------------------|---------|-----------------------------------------------------------------|--------------------------------------------------------------|--------------------------------------------------------------|-------------------------|
| Zn//poly(TEMPO) <sup>S9</sup>                                  | 1.70 V  | 1.1 AhL <sup>-1a</sup>                                          | ~98% (at 0.01A cm <sup>-2</sup> )                            | 81% (at 0.01A cm <sup>-2</sup> )                             | ~99.977% (1000 cycles)  |
| Zn//TEMPO-SO <sub>3</sub> K <sup>S10</sup>                     | 1.69 V  | 0.92 AhL <sup>-1a</sup>                                         | >98% (at 0.003 A cm <sup>-2</sup> )                          | >86% (at 0.003 A cm <sup>-2</sup> )                          | 99.994% (1100 cycles)   |
| Zn//FQ <sup>S13</sup>                                          | ~2.0 V  | ~4.5 AhL <sup>-1a</sup>                                         | 99.5% (at 0.02A cm <sup>-2</sup> )                           | 70.2% (at 0.02A cm <sup>-2</sup> )                           | 99.92% (50 cycles)      |
| Zn//pBQ <sup>S14</sup>                                         | >1.17 V | NA                                                              | ~72% (at 0.03A cm <sup>-2</sup> )                            | 42% (at 0.03A cm <sup>-2</sup> )                             | NA (20 cycles)          |
| Zn//g <sup>+</sup> -TEMPO <sup>S15</sup>                       | ~1.6 V  | ~4.2 AhL <sup>-1a</sup>                                         | 99.3% (at 0.02 A cm <sup>-2</sup> )                          | 77.1% (at 0.02 A cm <sup>-2</sup> )                          | 99.954% (140 cycles)    |
| PAQP <sub>y</sub> //NH <sub>2</sub> -TEMPO <sup>S16</sup>      | 1.02 V  | 23.9 mAhg <sup>-1</sup> (at 0.2 Ag <sup>-1</sup> ) <sup>b</sup> | NA                                                           | 53.9% (at 1A g <sup>-1</sup> )                               | 99.80% (100 cycles)     |
| PAQP <sub>y</sub> //G//NH <sub>2</sub> -TEMPO <sup>S16</sup>   | 1.02 V  | 62.2 mAhg <sup>-1</sup> (at 0.2 Ag <sup>-1</sup> ) <sup>b</sup> | 92% (at 1A g <sup>-1</sup> )                                 | 74.5% (at 1A g <sup>-1</sup> )                               | 99.68% (100 cycles)     |
| PPyQX//K <sub>4</sub> [Fe(CN) <sub>6</sub> ] <sup>S11</sup>    | 1.15 V  | 67.1 mAhg <sup>-1</sup> (at 1 Ag <sup>-1</sup> ) <sup>b</sup>   | 93.8% (at 4 A g <sup>-1</sup> )                              | 80.5% (at 4 A g <sup>-1</sup> )                              | ~99.975% (1000 cycles)  |
| TPPHZ//K <sub>4</sub> [Fe(CN) <sub>6</sub> ] <sup>S12</sup>    | 1.37 V  | 92.4 mAhg <sup>-1</sup> (at 1 Ag <sup>-1</sup> ) <sup>b</sup>   | 98.6% (at 10 A g <sup>-1</sup> or 10.2 mA cm <sup>-2</sup> ) | 87.2% (at 10 A g <sup>-1</sup> or 10.2 mA cm <sup>-2</sup> ) | 99.998% (1200 cycles)   |
| TPPHZ//G//K <sub>4</sub> [Fe(CN) <sub>6</sub> ] <sup>S17</sup> | 1.30 V  | 87.1 mAhg <sup>-1</sup> (at 0.5 Ag <sup>-1</sup> ) <sup>b</sup> | 95.1% (at 5 A g <sup>-1</sup> or 5.5 mA cm <sup>-2</sup> )   | 89.3% (at 5 A g <sup>-1</sup> or 5.5 mA cm <sup>-2</sup> )   | ~99.9938% (3000 cycles) |
| HATN//K <sub>4</sub> [Fe(CN) <sub>6</sub> ] in this work       | ~1.14 V | 267 mAhg <sup>-1</sup> (at 0.5 Ag <sup>-1</sup> ) <sup>b</sup>  | 99.7% (at 8 A g <sup>-1</sup> or 20 mA cm <sup>-2</sup> )    | 75.5% (at 8 A g <sup>-1</sup> or 20 mA cm <sup>-2</sup> )    | ~99.977% (1500 cycles)  |

<sup>a</sup>Based on the catholyte. <sup>b</sup>Based on the anode material.

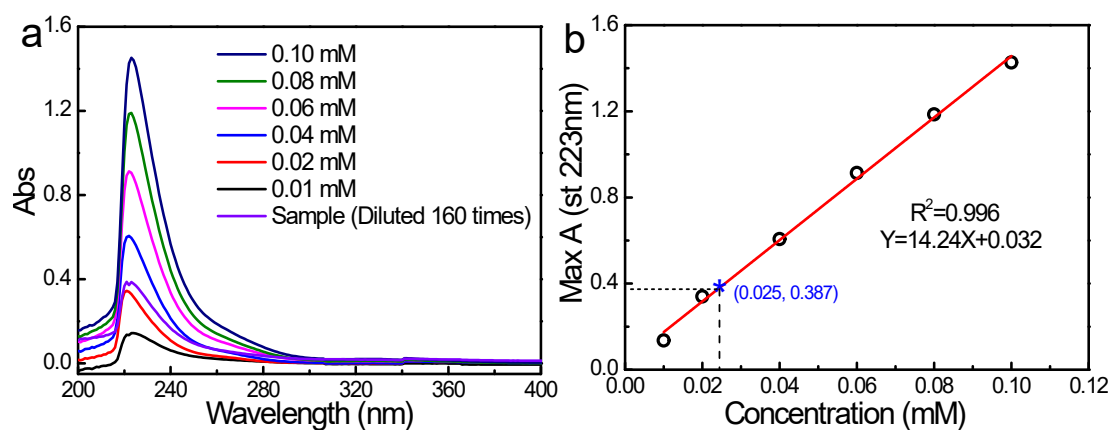

**Fig. S5** (a) UV-vis absorption spectra of the  $K_4Fe(CN)_6$  solution with different concentration. (b) The linear plot between the concentration of  $K_4Fe(CN)_6$  and the maximum absorbance recorded at  $\lambda=223$  nm. The concentration of  $K_4Fe(CN)_6$  at the anode side (acceptor half cell) was calculated to be  $\sim 3.99$  mM.

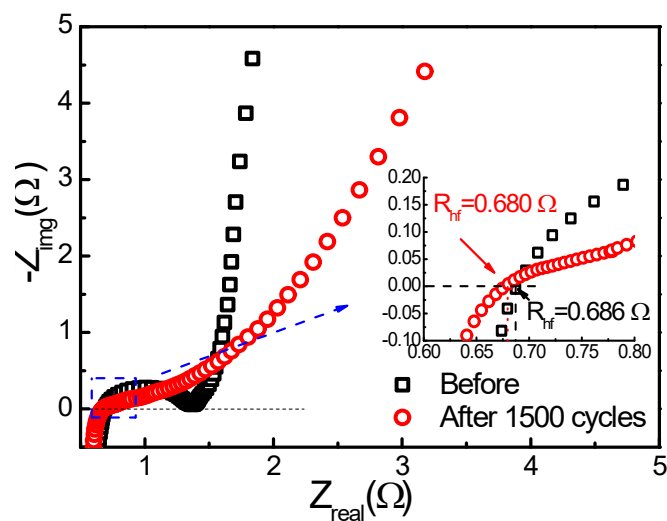

**Fig. S6** EIS spectra of the HATN// $K_4Fe(CN)_6$  cell before and after 1500 cycles.

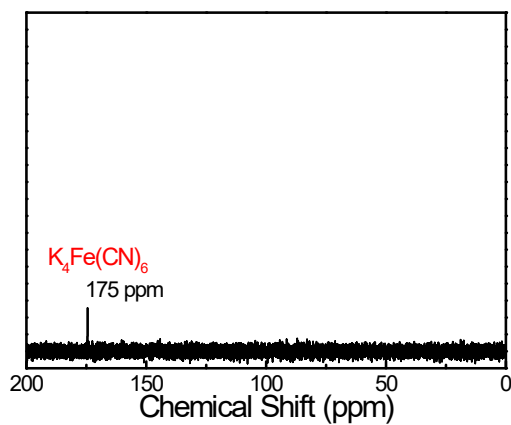

**Fig. S7**  $^{13}\text{C}$  NMR spectrum (125 MHz,  $\text{D}_2\text{O}$ ) for the supporting electrolyte on the HATN side after 1440 cycles at  $8 \text{ A g}^{-1}$ .

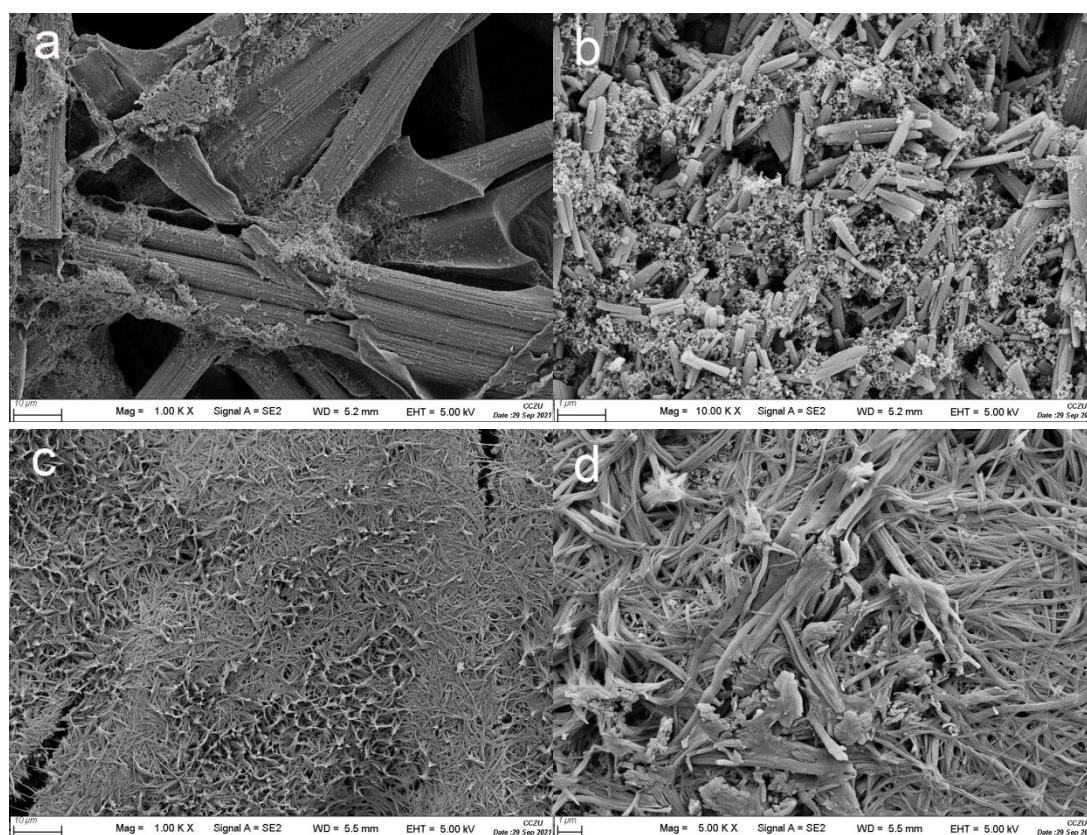

**Fig. S8** SEM images of a HATN electrode. (a, b) before cycling. (c, d) after cycling.

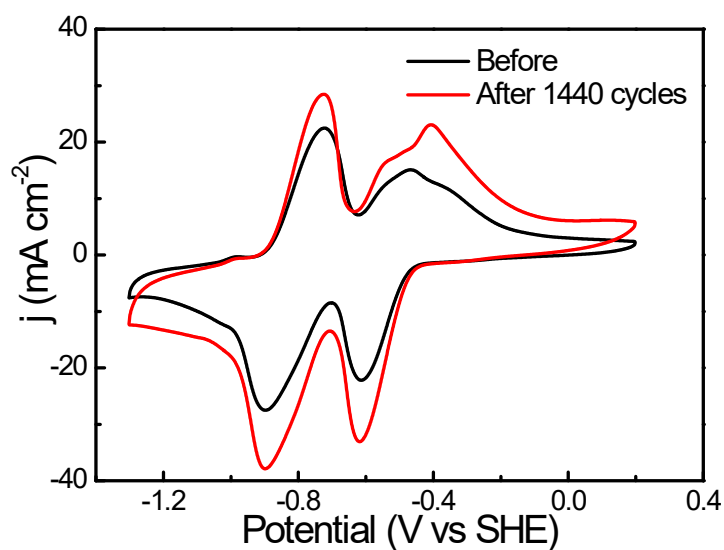

**Fig. S9** CV curves of the HATN electrode before and after 1440 cycles at 25 mVs<sup>-1</sup>.

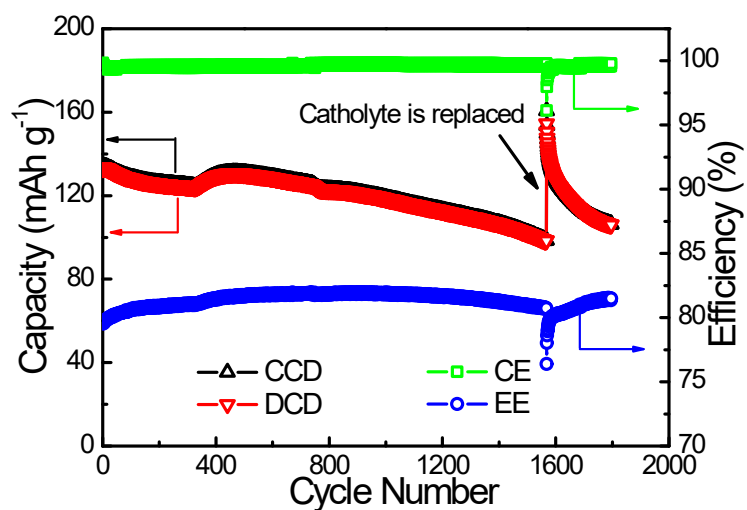

**Fig. S10** Cycling capacity retention and efficiency data of the HATN//K<sub>4</sub>[Fe(CN)<sub>6</sub>] cell at 8 A g<sup>-1</sup>. 1 M KOH + 0.35 M KCl solution (10 mL) was used as the anodic supporting electrolyte while 50 mM K<sub>4</sub>[Fe(CN)<sub>6</sub>] + 50 mM K<sub>3</sub>[Fe(CN)<sub>6</sub>] in 1 M KOH solution (10 mL) was used as the catholyte. After 1568 cycles, the Fe(CN)<sub>6</sub><sup>4-</sup>/Fe(CN)<sub>6</sub><sup>3-</sup> catholyte was replaced with a fresh one.

## References

- [S1] (a) Laviron, E. *J. Electroanal. Chem.* 1979, 101, 19; (b) S. Chatterjee, K. Sengupta, S. Bandyopadhyay, A. Dey, *J. Mater. Chem. A* 2016, 4, 6819.
- [S2] B. Li, Z. Nie, M. Vijayakumar, G. Li, J. Liu, V. Sprenkle, W. Wang, *Nat. Commun.* 2015, 6, 6303.
- [S3] G.-M. Weng, Z. Li, G. Cong, Y. Zhou, Y.-C. Lu, *Energy Environ. Sci.* 2017, 10, 735.
- [S4] C. Xie, Y. Liu, W. Lu, H. Zhang, X. Li, *Energy Environ. Sci.* 2019, 12, 1834.
- [S5] Y. Yin, S. Wang, Q. Zhang, Y. Song, N. Chang, Y. Pan, H. Zhang, X. Li, *Adv. Mater.* 2020, 32, 1906803.
- [S6] J.-H. Lee, R. Kim, S. Kim, J. Heo, H. Kwon, J. H. Yang, H.-T. Kim, *Energy Environ. Sci.* 2020, 13, 2839.
- [S7] Z. Yuan, Y. Duan, T. Liu, H. Zhang, X. Li, *iScience* 2018, 3, 40.
- [S8] C. Xie, T. Li, C. Deng, Y. Song, H. Zhang, X. Li, *Energy Environ. Sci.* 2020, 13, 135.
- [S9] J. Winsberg, T. Janoschka, S. Morgenstern, T. Hagemann, S. Muench, G. Hauffman, J.-F. Gohy, M. D. Hager, U. S. Schubert, *Adv. Mater.*, 2016, 28, 2238.
- [S10] J. Winsberg, C. Stolze, A. Schwenke, S. Muench, M. D. Hager, U. S. Schubert, *ACS Energy Lett.*, 2017, 2, 411.
- [S11] B. Wang, Y. Zhang, Y. Zhu, Y.-M. Shen, W. Wang, Z. Chen, J. Cao, J. Xu, *J.*

*Power Sources* 2020, 451, 227788.

[S12] Y. Zhang, J. Cao, Z. Chen, J. Xu, C. Yu, *J. Mater. Chem. A* 2020, 8, 6874.

[S13] M. Park, E. S. Beh, E. M. Fell, Y. Jing, E. F. Kerr, D. DePorcellinis, M.-A. Goulet, J. Ryu, A. A. Wong, R. G. Gordon, J. Cho and M. J. Aziz, *Adv. Energy Mater.*, 2019, 1900694.

[S14] P. K. Leung, T. Martin, A. A. Shah, M. R. Mohamed, M. A. Anderson and J. Palma, *J. Power Sources*, 2017, 341, 36.

[S15] Z. Chang, D. Henkensmeier, R. Chen, *ChemSusChem*, 2017, 10, 3193-3197.

[S16] J. Cao, F. Ding, H. Chen, H. Wang, W. Wang, Z. Chen, J. Xu, *J. Power Sources* 2019, 423, 316-322.

[S17] Y. Zhang, W. Liu, Z. Wang, Y.-M. Shen, W. Wang, Z. Chen, J. Xu, J. Cao, *Carbon* 2020, 161, 309-315.
